# Supplementary material
Source: Springer Nature journal article supplement (https://www.springermedizin.de/resource/supplementary/12889_2011_3709_MOESM1_ESM.pdf/9489452)

## A. Total study sample

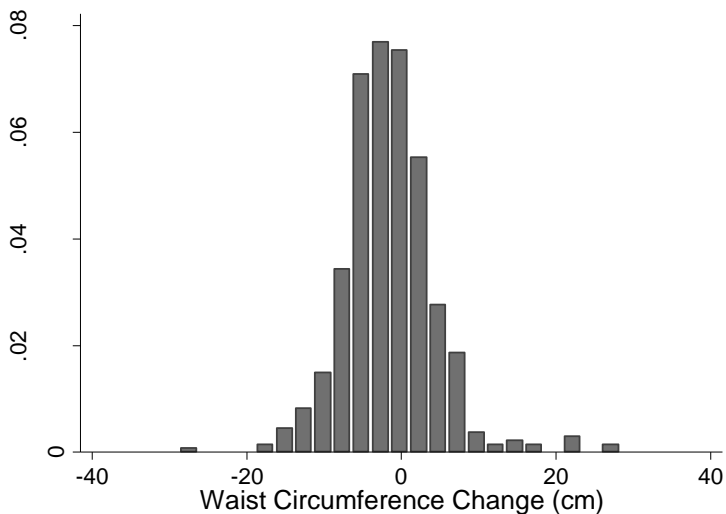

## B. By sex

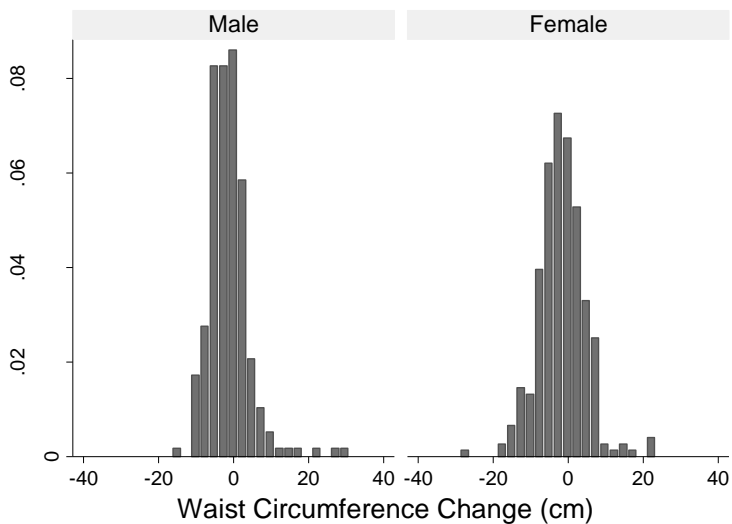

Supplement: MOESM1 [file 9489452]
